# Supplementary material
Source: Research Square preprint supplement (doi:10.21203/rs.3.rs-9234842/v1)
Supplement: Supplementary file 1 [file 86a4c949728c4839901d2454.docx]

**Table S1. Clinical characteristics of primiparous women with endometriosis (n = 118)**

| **Characteristic** | **Value** |
| --- | --- |
| Age at endometriosis diagnosis, years, median (IQR) | 32 (30–36) |
| Endometriosis diagnosed before pregnancy, n (%) | 113 (95.8) |
| Endometriosis diagnosed at delivery, n (%) | 5 (4.2) |
| Interval between endometriosis diagnosis and first delivery, months, median (IQR) | 25.4 (16.0–44.6) |
| Endometriosis phenotype, n (%) |  |
| – Peritoneal endometriosis | 65 (55.1) |
| – Ovarian endometrioma | 56 (47.5) |
| – Deep infiltrating endometriosis | 53 (44.9) |
| Adenomyosis, n (%) | 29 (24.6) |

Data are presented as median (IQR) or n (%). Endometriosis was laparoscopically and histologically confirmed prior to the index pregnancy in all but five women. Endometriosis phenotypes were not mutually exclusive. IQR, interquartile range.

**Table S2. Additional pregnancy outcomes in primiparous women with and without endometriosis**

| **Outcome** | **Endometriosis (n = 118)** | **Controls (n = 15,915)** | **P-value** |
| --- | --- | --- | --- |
| Birthweight, g, mean (SD) | 3171 (573) | 3143 (691) | 0.912 |
| Sex of the newborn, n (%) |  |  | 0.279 |
| – Female | 50 (42.4) | 7646 (48.0) |  |
| – Male | 66 (55.9) | 8237 (51.8) |  |
| Gestational diabetes, n (%) | 8 (6.8) | 1138 (7.2) | 0.876 |

Data are presented as mean (SD) or n (%). P-values were calculated using chi-square test for categorical variables and Mann–Whitney U test for continuous variables. SD, standard deviation.

**Table S3. Sensitivity analysis excluding women with adenomyosis**

| **Group** | **Placenta previa, n (%)** |  |
| --- | --- | --- |
| Endometriosis (n = 89) | 3 (3.4) |  |
| Controls (n = 15,915) | 83 (0.5) |  |
|  |  |  |
| **Adjusted analysis** |  |  |
| **Outcome** | **Adjusted OR (95% CI)** | **P-value** |
| Placenta previa | 4.08 (1.21 – 13.75) | 0.023 |

Adjusted for maternal age at delivery and medically assisted reproduction.
